# Supplementary material
Source: Springer Nature journal article supplement (https://www.springermedizin.de/resource/supplementary/13229_2014_130_MOESM9_ESM.pdf/9676242)

**1-Virtual environment**

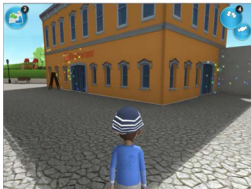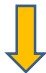

**2-Restaurant**

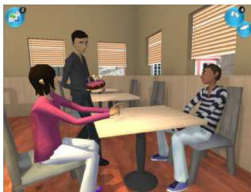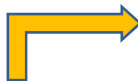

**3-Emotion recognition/deduction in context**

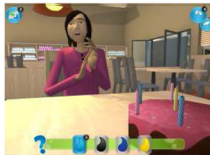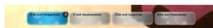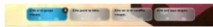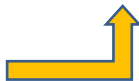

**(Animated scene)**

**4-Reward**

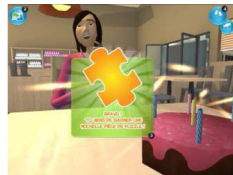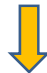

**5-Action choice**

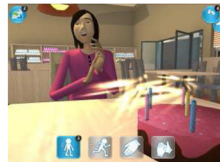

Supplement: MOESM9 [file 9676242]
